# Supplementary material
Source: MDPI journal article supplement (https://www.mdpi.com/2073-4433/15/3/361)
Supplement: s1 [file s1]

## Supplementary Materials

The supplementary materials included in the paper intitled “Assessment of Water Resources Under Climate Change in Western Hindukush Region: A Case Study of the Upper Kabul River Basin” as followings.

### *Land use type*

The land use map of UKRB includes thirteen major classes which includes intensively agricultural, rainfed area, fruit trees, vineyard, barren land and sand cover, forest close and needle leaved areas, rangeland, marshland, urban area, irrigated agricultural land (marginal irrigation), forest with undifferentiated areas, shrubs with degenerated forests, and water bodies. The area for each land use type is shown in Table S1.

**Table S1.** shows the land cover classification area in the UKRB in Afghanistan

| No | Land cover Types                         | Area (Km2) | Area (%) |
|----|------------------------------------------|------------|----------|
| 1  | Intensively cultivated (1 or 2 crop/yr)  | 1552.0     | 6.0      |
| 2  | Rainfed Ag. land                         | 521.5      | 2.0      |
| 3  | Fruit trees                              | 259.1      | 1.0      |
| 4  | Vineyard                                 | 189.7      | 0.72     |
| 5  | Barren/sand cover                        | 2050.9     | 7.9      |
| 6  | Forest close and open needle leaved      | 160.5      | 0.6      |
| 7  | Rangeland                                | 19534.2    | 75.0     |
| 8  | Marshland                                | 78.1       | 0.3      |
| 9  | Urban areas                              | 445.8      | 1.7      |
| 10 | Irrigated Ag. land (marginal irrigation) | 638.8      | 2.5      |
| 11 | Forest undifferentiated                  | 10.8       | 0.01     |
| 12 | Shrubs/degenerated forest                | 72.4       | 0.3      |
| 13 | Water/snow                               | 529.0      | 2.0      |
|    | Total                                    | 26,043     | 100      |

### *Soil type*

Soil data type obtained from FAO/UNESCO website (FAO-UNESCO, 1971). The digitized soil map of the world at 1:5,000,000 scale was in the geographic projection and converted to UTM projections (WGS1984, UTM Zone 42N) using the raster projection in Arc-map before using in SWAT. Table S2 shows the soil classification type, texture, the area, and the soil hydrology group (SHG) in the UKRB.

**Table S2.** Shows area of soil classifications in the UKRB.

| No | Soil Type                    | Area Km2 | Area (%) | Texture | SHG |
|----|------------------------------|----------|----------|---------|-----|
| 1  | Lithosols- Cambisols-Rankers | 9484.7   | 36.4     | Loam    | C   |
| 2  | Lithosols- Xerosols          | 12271.0  | 47.1     | Loam    | D   |
| 3  | Calcaric Flurisol            | 4005.7   | 15.4     | Loam    | D   |
| 4  | Glaciers                     | 281.5    | 1.1      | UWD     | D   |
|    | Total                        | 26,043   | 100      | -       | -   |

#### *Meteorological stations location*

**Table S3.** Show the stations name, elevation and data availability in the study area (UKRB). NAWARA is the abbreviation form the National Water Affairs Regulation Authority, and MAIL is the abbreviation for Ministry of Agriculture, Irrigation and Livestock in the table.

| No | Name            | Latitude | Longitude | Elevation (m) | Owner  | Precipitation | Temperature |
|----|-----------------|----------|-----------|---------------|--------|---------------|-------------|
| 1  | Bagh-i-Lala     | 35.15    | 69.22     | 1698          | NAWARA | Yes           | Yes         |
| 2  | Bagh-i-Omomi    | 35.15    | 69.29     | 1587          | NAWARA | Yes           | Yes         |
| 3  | Doabi           | 35.35    | 69.62     | 2059          | NAWARA | Yes           | Yes         |
| 4  | Keraman         | 35.28    | 69.66     | 2232          | NAWARA | Yes           | Yes         |
| 5  | Khawak          | 35.56    | 69.89     | 2405          | NAWARA | Yes           | Yes         |
| 6  | Naghlu          | 34.64    | 69.72     | 998           | NAWARA | Yes           | Yes         |
| 7  | Omarz           | 35.38    | 69.64     | 2042          | NAWARA | Yes           | Yes         |
| 8  | Pul-i-Ashawa    | 35.09    | 69.14     | 1624          | NAWARA | Yes           | Yes         |
| 9  | Pul-i-Surkh     | 34.37    | 68.77     | 2216          | NAWARA | Yes           | Yes         |
| 10 | Payin-i-Qargha  | 34.55    | 69.04     | 1970          | NAWARA | Yes           | Yes         |
| 11 | Qala-i-Malik    | 34.58    | 68.97     | 2211          | NAWARA | Yes           | Yes         |
| 12 | Tang-i-Gulbahar | 35.16    | 69.29     | 1625          | NAWARA | Yes           | Yes         |
| 13 | Tang-i-Saidan   | 34.41    | 69.1      | 1870          | NAWARA | Yes           | No          |
| 14 | Badam Bagh      | 34.55    | 69.118    | 1803          | MAIL   | Yes           | No          |
| 15 | Gul Khana       | 34.506   | 69.202    | 1793          | MAIL   | Yes           | No          |
| 16 | Kapisa Agri     | 35.026   | 69.346    | 1471          | MAIL   | Yes           | No          |
| 17 | Kohestan        | 35.088   | 69.329    | 1536          | MAIL   | Yes           | No          |
| 18 | Logar           | 33.988   | 69.046    | 1922          | MAIL   | Yes           | No          |
| 19 | Dashtak         | 35.38    | 69.48     | 3401          | MAIL   | Yes           | No          |
| 20 | Charikar        | 35.043   | 69.185    | 1559          | MAIL   | Yes           | No          |
| 21 | Seya Gerd       | 34.999   | 68.858    | 1848          | MAIL   | Yes           | No          |

#### *Hydrological stations location*

**Table S4.** Shows the observed flow stations used during calibration and validation periods. With the 1870 m from see level (m.s.l) Tang-i-Saidan is the highest station. While Shukhi station has the lowest elevation of 1374 m.s.l in the UKRB.

| No | Stations        | Latitude | Longitude | Elevation (m) | Location       | Drainage area (Km <sup>2</sup> ) |
|----|-----------------|----------|-----------|---------------|----------------|----------------------------------|
| 1  | Tang-i-Saidan   | 34.40897 | 69.104411 | 1870          | Maidan river   | 1642                             |
| 2  | Sang-i-Nawishta | 34.41818 | 69.19113  | 1813          | Logar river    | 9718                             |
| 3  | Tangi-i-Gharu   | 34.56988 | 69.402169 | 1775          | Kabul river    | 12,810                           |
| 4  | Tang-i-Gulbahar | 35.15932 | 69.288683 | 1625          | Panjshir river | 3527                             |
| 5  | Pul-i-Ashawa    | 35.0888  | 69.141886 | 1624          | Gorband river  | 4008                             |
| 6  | Shukhi          | 34.93616 | 69.484394 | 1374          | Panjshir river | 10840                            |

## Data Sources

**Table S5.** Sources of data used for the present and future simulations of runoff in the UKRB. The data description includes, data type, time period the data used and the provider of the data.

| Data Type                         | Name                       | Resolution           | Period used | Source                                                                                                                                                                                    |
|-----------------------------------|----------------------------|----------------------|-------------|-------------------------------------------------------------------------------------------------------------------------------------------------------------------------------------------|
| Spatial data                      | DEM                        | 30 m                 | -           | USGS Website, <a href="https://earthexplorer.usgs.gov">https://earthexplorer.usgs.gov</a>                                                                                                 |
|                                   | Land use                   | 30 m                 | -           | FAO/MAIL, <a href="https://www.fao.org/publications/card/en/c/21ba617f-cbaa-498f-a8cd-0ec49daea6ab/">https://www.fao.org/publications/card/en/c/21ba617f-cbaa-498f-a8cd-0ec49daea6ab/</a> |
|                                   | Soil type                  | 1:5000,000, or 50 km | -           | Harmonized world soil database v1.2   FAO SOILS PORTAL   Food and Agriculture Organization of the United Nations                                                                          |
| Meteorological data               | Precipitation, temperature | Daily                | 2009-2019   | NAWARA, MAIL                                                                                                                                                                              |
| Hydrological data                 | Discharge                  | Monthly              | 2010-2018   | NAWARA                                                                                                                                                                                    |
| <b>Historical and Future Data</b> |                            |                      |             |                                                                                                                                                                                           |
| APHRODITE data                    | Precipitation, temperature | 0.25°                | 1986-2005   | <a href="https://www.chikyu.ac.jp/precip/english/products.html">https://www.chikyu.ac.jp/precip/english/products.html</a>                                                                 |
| RCMs output                       | Precipitation, temperature | 0.44°                | 2030-2049   |                                                                                                                                                                                           |
| (RCP4.5 & RCP8.5)                 |                            |                      | 2080-2099   | <a href="https://esgf-data.dkrz.de/search/cmip5-dkrz/">https://esgf-data.dkrz.de/search/cmip5-dkrz/</a>                                                                                   |

The future precipitation and temperature data from four RCM/GCM outputs used in this study includes:

1. RCA4/CanESM2, from the Swedish Meteorological and Hydrological Institute (SMHI) in Sweden
2. RCA4/Miroc5, from the Swedish Meteorological and Hydrological Institute (SMHI) in Sweden
3. RegCM4-4/NOAA-GFDL-ESM2M, from the Indian Institute of Tropical Meteorology (IITM) in India
4. REMO2009/MPI-ESM-LR, from the Max Planck Institute for Meteorology- Climate Service Center (MPI-CSC) in Germany

Annual water balance diagram

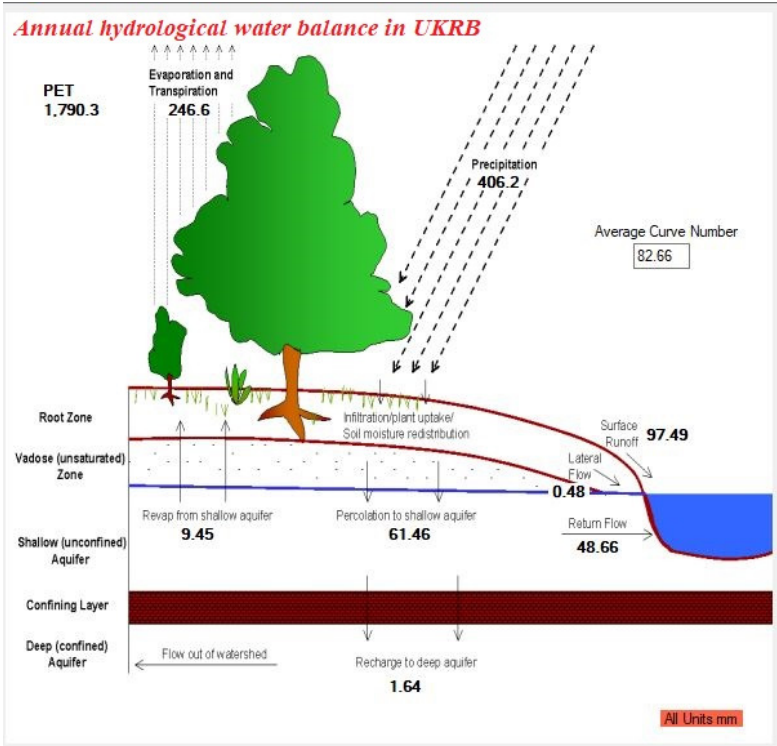

**Figure S1.** The diagram shows the annual water balance in the upper Kabul river basin (UKRB) under current scenario (2010 to 2019).
